# Supplementary material for: Baseline profile of intrinsic cytokines predicting prognosis of chronic hepatitis B patients responding to HBV therapeutic vaccinations
Source: bioRxiv or medRxiv preprint supplement (doi:10.1101/2022.04.18.22273944), 2022-04-18
Supplement: Supplementary file [file media-1.pdf]

# Reporting checklist for prediction model development/validation.

Based on the TRIPOD guidelines.

|                     | Reporting Item                                                                                                                                                                                                       | Page Number |
|---------------------|----------------------------------------------------------------------------------------------------------------------------------------------------------------------------------------------------------------------|-------------|
| <b>Title</b>        |                                                                                                                                                                                                                      |             |
|                     | <a href="#">#1</a> Identify the study as developing and / or validating a multivariable prediction model, the target population, and the outcome to be predicted.                                                    | 1           |
| <b>Abstract</b>     |                                                                                                                                                                                                                      |             |
|                     | <a href="#">#2</a> Provide a summary of objectives, study design, setting, participants, sample size, predictors, outcome, statistical analysis, results, and conclusions.                                           | 3           |
| <b>Introduction</b> |                                                                                                                                                                                                                      |             |
|                     | <a href="#">#3a</a> Explain the medical context (including whether diagnostic or prognostic) and rationale for developing or validating the multivariable prediction model, including references to existing models. | 4           |
|                     | <a href="#">#3b</a> Specify the objectives, including whether the study describes the development or validation of the model or both.                                                                                | 5           |
| <b>Methods</b>      |                                                                                                                                                                                                                      |             |
| Source of data      | <a href="#">#4a</a> Describe the study design or source of data (e.g., randomized trial, cohort, or registry data), separately for the development and validation data sets, if applicable.                          | 13          |
| Source of data      | <a href="#">#4b</a> Specify the key study dates, including start of accrual; end of accrual; and, if applicable, end of follow-up.                                                                                   | n/a         |
| Participants        | <a href="#">#5a</a> Specify key elements of the study setting (e.g., primary care, secondary care, general population) including number and location of centres.                                                     | n/a         |

|                              |                      |                                                                                                                                                                         |     |
|------------------------------|----------------------|-------------------------------------------------------------------------------------------------------------------------------------------------------------------------|-----|
| Participants                 | <a href="#">#5b</a>  | Describe eligibility criteria for participants.                                                                                                                         | 14  |
| Participants                 | <a href="#">#5c</a>  | Give details of treatments received, if relevant                                                                                                                        | n/a |
| Outcome                      | <a href="#">#6a</a>  | Clearly define the outcome that is predicted by the prediction model, including how and when assessed.                                                                  | 10  |
| Outcome                      | <a href="#">#6b</a>  | Report any actions to blind assessment of the outcome to be predicted.                                                                                                  | 10  |
| Predictors                   | <a href="#">#7a</a>  | Clearly define all predictors used in developing or validating the multivariable prediction model, including how and when they were measured                            | 15  |
| Predictors                   | <a href="#">#7b</a>  | Report any actions to blind assessment of predictors for the outcome and other predictors.                                                                              | n/a |
| Sample size                  | <a href="#">#8</a>   | Explain how the study size was arrived at.                                                                                                                              | n/a |
| Missing data                 | <a href="#">#9</a>   | Describe how missing data were handled (e.g., complete-case analysis, single imputation, multiple imputation) with details of any imputation method.                    | n/a |
| Statistical analysis methods | <a href="#">#10a</a> | If you are developing a prediction model describe how predictors were handled in the analyses.                                                                          | 16  |
| Statistical analysis methods | <a href="#">#10b</a> | If you are developing a prediction model, specify type of model, all model-building procedures (including any predictor selection), and method for internal validation. | 15  |
| Statistical analysis methods | <a href="#">#10c</a> | If you are validating a prediction model, describe how the predictions were calculated.                                                                                 | 5   |
| Statistical analysis methods | <a href="#">#10d</a> | Specify all measures used to assess model performance and, if relevant, to compare multiple models.                                                                     | 10  |
| Statistical analysis methods | <a href="#">#10e</a> | If you are validating a prediction model, describe any model updating (e.g., recalibration) arising from the validation, if done                                        | n/a |
| Risk groups                  | <a href="#">#11</a>  | Provide details on how risk groups were created, if done.                                                                                                               | n/a |
| Development vs. validation   | <a href="#">#12</a>  | For validation, identify any differences from the development data in setting, eligibility criteria, outcome, and predictors.                                           | 10  |

## Results

|                     |                      |                                                                                                                                                                                                       |     |
|---------------------|----------------------|-------------------------------------------------------------------------------------------------------------------------------------------------------------------------------------------------------|-----|
| Participants        | <a href="#">#13a</a> | Describe the flow of participants through the study, including the number of participants with and without the outcome and, if applicable, a summary of the follow-up time. A diagram may be helpful. | 14  |
| Participants        | <a href="#">#13b</a> | Describe the characteristics of the participants (basic demographics, clinical features, available predictors), including the number of participants with missing data for predictors and outcome.    | 14  |
| Participants        | <a href="#">#13c</a> | For validation, show a comparison with the development data of the distribution of important variables (demographics, predictors and outcome).                                                        | 14  |
| Model development   | <a href="#">#14a</a> | If developing a model, specify the number of participants and outcome events in each analysis.                                                                                                        | 6   |
| Model development   | <a href="#">#14b</a> | If developing a model, report the unadjusted association, if calculated between each candidate predictor and outcome.                                                                                 | n/a |
| Model specification | <a href="#">#15a</a> | If developing a model, present the full prediction model to allow predictions for individuals (i.e., all regression coefficients, and model intercept or baseline survival at a given time point).    | 10  |
| Model specification | <a href="#">#15b</a> | If developing a prediction model, explain how to use it.                                                                                                                                              | 8   |
| Model performance   | <a href="#">#16</a>  | Report performance measures (with CIs) for the prediction model.                                                                                                                                      | n/a |
| Model-updating      | <a href="#">#17</a>  | If validating a model, report the results from any model updating, if done (i.e., model specification, model performance).                                                                            | 10  |

## Discussion

|             |                     |                                                                                                                  |    |
|-------------|---------------------|------------------------------------------------------------------------------------------------------------------|----|
| Limitations | <a href="#">#18</a> | Discuss any limitations of the study (such as nonrepresentative sample, few events per predictor, missing data). | 13 |
|-------------|---------------------|------------------------------------------------------------------------------------------------------------------|----|

|                           |                      |                                                                                                                                                |     |
|---------------------------|----------------------|------------------------------------------------------------------------------------------------------------------------------------------------|-----|
| Interpretation            | <a href="#">#19a</a> | For validation, discuss the results with reference to performance in the development data, and any other validation data                       | 13  |
| Interpretation            | <a href="#">#19b</a> | Give an overall interpretation of the results, considering objectives, limitations, results from similar studies, and other relevant evidence. | 13  |
| Implications              | <a href="#">#20</a>  | Discuss the potential clinical use of the model and implications for future research                                                           | 13  |
| <b>Other information</b>  |                      |                                                                                                                                                |     |
| Supplementary information | <a href="#">#21</a>  | Provide information about the availability of supplementary resources, such as study protocol, Web calculator, and data sets.                  | n/a |
| Funding                   | <a href="#">#22</a>  | Give the source of funding and the role of the funders for the present study.                                                                  | 16  |

The TRIPOD checklist is distributed under the terms of the Creative Commons Attribution License CC-BY. This checklist was completed on 15. April 2022 using <https://www.goodreports.org/>, a tool made by the [EQUATOR Network](#) in collaboration with [Penelope.ai](#)
